# Supplementary material for: Studies on the Expression of Sesquiterpene Synthases Using Promoter-β-Glucuronidase Fusions in Transgenic Artemisia annua L
Source: PubMed Central journal article supplement (PMC3838408; doi:10.1371/journal.pone.0080643), 2013-11-22
Supplement: pone.0080643.s001.pdf [file pone.0080643.s001.pdf]

|                                                                                  |                    |                                                                                   |                   |                                                                                     |                 |
|----------------------------------------------------------------------------------|--------------------|-----------------------------------------------------------------------------------|-------------------|-------------------------------------------------------------------------------------|-----------------|
|    | 3-AF3 binding site |    | CBFHV             |    | MBS             |
|   | AAGAA motif        |   | CGCG-box          |   | MNF1            |
|  | ACE                |  | CGTCA/TGACG-motif |  | MRE             |
|  | AC-II              |  | Chs-CMA1a         |  | O2-site         |
|  | ABRE               |  | circadian         |  | P-box           |
|  | ACTTTA motif       |  | E-box             |  | Py-rich region  |
|  | AE-box             |  | ERE               |  | RAA-motif       |
|  | AG-box             |  | Eri box3          |  | RY-element      |
|  | ARE                |  | GAG-motif         |  | Skn-1           |
|  | AS-2-box           |  | GA-motif          |  | Sp1             |
|  | ATCT-motif         |  | GARE-motif        |  | TCA-element     |
|  | AT1-motif          |  | GATA-box          |  | TC-rich repeats |
|  | AT-rich element    |  | G-box             |  | TCT-motif       |
|  | AU-RR core         |  | GCN4-motif        |  | TGA-element     |
|  | Box 1              |  | GT1-box           |  | T/G box         |
|  | Box 4              |  | HSE               |  | W1-box          |
|  | CAT-box            |  | L-box             |  | WUN             |
