# Supplementary material for: Studies on the Expression of Sesquiterpene Synthases Using Promoter-β-Glucuronidase Fusions in Transgenic Artemisia annua L
Source: PubMed Central journal article supplement (PMC3838408; doi:10.1371/journal.pone.0080643), 2013-11-22
Supplement: pone.0080643.s002.pdf [file pone.0080643.s002.pdf]

-1875 AGTTAATTCGCATATATGCTGAAAGTTGGCGTTGGTTTAACTTTAAACACTTCAGAAAAATCCACAAAATTCC -1801  
 TCAATTAACGTGTATATACGACTTTCAACCCGCAACCAAATTGAAATTTGTGAAGTCTTTTTAGGTGTTTTAAGG  
 WUN GT-1 box GT-1 box E-box  
 -1800 AGGAAGTCACAAATAACCCAAATATTAACCTCTGAAAAGGAGAGCTCCTAAACCCCTGTGGTTTGAATAATGAAAAATCAAAAAACCATCTGAAATTTTCA -1701  
 TCCTTCAGTGTTTATTGGGTTTATAATGAGGACTTTTTCTCTCGAGGATTGGGGACACCAAACCTTTTACTTTTTAGTTTTTGTGGTAGACTTAAAAGT  
 GATA-box  
 -1700 GACTCATAAACTCAGGATTTGATAAACCAATGTTCTAAAAATCAGAAAGCTTACCTCCGACCTCTCATGACCATGTAACTTACATATTCAGAAAATATACA -1601  
 CTGAGTATTTGAGTCTTAACCTATTGGTTACAAGATTTTGTCTTTTCGAATGGAGGGCTGGAGACTCTGGTACATTTGAATGTATAAGTCTTTAATATGT  
 Skn-1 RAA-motif G-box E-box  
 -1600 GAAAGTACTCATGTTTAGACTCAAGAATCGCCAAAAACACATTTCTATCATTAACTTATGACCCTTCTAACCCGACCCATCTCTGGACAGCATGCAGT -1501  
 CTTTCATGAGTACAAATCTGAGTCTTTAGCGGGTTTTTGTGTAAGAGTAGTAAATGAACTACTGGGAACGTTGTGCTGGGTAGAGGACCTGTCGTACCTCA  
 GATA-box WUN Skn-1 G-box MBS  
 -1500 TGAGACAGAAACAAACCTTAACCTCCTAATTCATTACATAGCCCTTAAATTAATAACTACTCTAGGTTTTTCCAGATTTTAGGTCACTCTTAAATGATCATT -1401  
 ACTCTGTCTTTGTTTGGGATTGGGAGGATTAAGTAAGTATCGGGTAAATAAATAAAGTAGACTCCCAAAAAGGCTCAAAAATCCAGTGCAGAAATTAAGTAGTAA  
 TGA-element E-box GARE-motif AE-box CBFHV GT-1 box  
 -1400 AAATGATTTTACTTACCGCTGTATTCCCACTGATTCAAATGCACAAAACAGAAAACAAAGTTCGACCCATAGGATTATGGTTTCATGATTTTAGGTCTTGT -1301  
 TTTACTAAAATGATGCTGCACATAAGGGTAACCTAAGTTTACTGTCTTTTGTCTTTGTTCCAGCTGGGTATCTTAATACCAAAGTACTAAAATCCAGAAC  
 Skn-1  
 -1300 GTTTCAAATCTTATGACTTGGTACATGTTATAACAATTCACAAATGTCTTAAACAACCATTATAGCGTGACATGAATTAAGGAAAATGAGAAAGAAAAA -1201  
 CAAAGTTAAGAACTACTGAACCATGTACAATATTGTTAGGTGTTTACAGCAATTTGTTGGTAATATCGCACTGTACTTAATTCCTTTTACTCTCTTTTTT  
 Skn-1 GATA-box py-rich region  
 -1200 AATAGAATCGTTACCCCTTTATTTTGTGTCGAATGAAAATGAAATCGTGAGCTCTATAGGAATTCGCGACTACACACTGGACCGAATCAAATGCAT -1101  
 TTATCTTAGCAATGGGAAAATAAAAACACAGCTTACTTTTACTTTTAGCACTCAGATATCCTTAAGCGGTGATGTGTACTACTGGCTTAAAGTTTTACGTA  
 GATA-box AU-RR core  
 -1100 CCTAGCCTTCTGATTGATCACCACATCGAACGGGAGGAAAAGCAGCTTGGCCCTCATTTTGGTGGAGATAAAAAGTTCATACGCATTTTTTATTTTGAT -1001  
 GGATCGGAAGAACTAAGTGGTGTAGCTTGCCCTCTCTTTTCGTCGAACCGGAGTAAAACCACCTCTATTTTCAAGTATCGGTAAAAATAAACTA  
 ACE Spl  
 -1000 GTTAGGGTTTTGAGAACAAAACCGGTTATGTAATATTTTGTAGGACTTGGGCTTGGGAAAATTAATGGGTCAATTGGGGAGTGTTTAGAAAAGGCCCAA -901  
 CAATCCAAAACCTCTGTTTTGGCCAATACATAATAAAAACACTCTGAAACCCGAACCTTTTAAATTACCCAGTTAACCCCTCACAAATCTTCCGGGTT  
 circadian W1-box  
 -900 TGGATTTTAGTTGGGGTTAGTTTAGTCCGTGTAGCTTGTGTCGAATAATCGTGGCCAAAACAATTAATCGGGTTTCGGTTAAATAATATCGTAGCCCA -801  
 ACCTAAAATCAACCCCAATCAAAATCAGGCACATCGAACACAGCTTATTAGCACCGGGTTTTTGTATAAGCCCAAAGCAAATTTATTAATAGCATCCGGT  
 box 4 GATA-box GATA-box  
 -800 AATTTAATTTACAAAATTTAAATTAACGGCTTATAATGACATGTTGGTTCAAAATTTAATTTATATACATATTTATACATATTACGGGTCGTAGTGAATT -701  
 TTAATTTAATGTTTTTAAATTAATGCCGAATATTAAGTGTACAAAACCAAGTTTTAAATTAATATAGTGTATAAATGTATAATGCCAGCATCACTTTTAA  
 MBS Skn-1 WUN E-box GATA-box WUN HSE  
 -700 GTTTAACCGTTTACGAAATTCGGTTCATTACATACAAGCACACCCCTTAAATGTTACCATTTGAGGGTTTATATAGTTATACTAGGCCCCACATATGGGCC -601  
 CAAATTGCCAAATGCTTTAAGCCAGTAATGTATGTTGCTGTGGAAATTTACAATGGTAAACTCCCAAATATATCAATATGATCCGCGGTGTATACCCGG  
 WUN  
 -600 TTGATGGGCTTGGTGGTGTAGACTTGCATTTTACCTTTTACACTTTTATTAACAAGCTTACACTATCCTAACACATTACTATCATACAAATGTCCATAGCC -501  
 AACTACCCGAACACCACAATCTGAACGTAAACAAAATGTGAAAATAATGTCGAATGTGATAGGATTGTGTATAGATAGTAGTATGTTACAGGTATCGG  
 circadian GATA-box GA-motif GATA-box Skn-1 GCN4-motif  
 -500 CGATACTACTTTAATACAATTAACAACAGTTAGAAGGTTCTTAATACAATAATGACTATCACTTCTTTAATGCTGACACATATTGTGCTTGAGTCA -401  
 GCTATGATGAAATATGTTAATGATAGTGTGCAACTCTCCAAGAATTATGTTATTAAGTATAGTGAAGAAAATTACAGCTGTGTATAACACGAACCTCAGT  
 GATA-box T/G-box Skn-1 GATA-box GCN4-motif GATA-box RAA-motif  
 -400 TATTTGAAGCAATAATATTGATTAATTTGATCTTAAATTTAGTGTAGAAAATAACAAGAAACATGGATCCGGTGTTTTATAGGATATAGGACAACAATG -301  
 ATAAAATCTCTGTTTATATAACTAATGTAAACTAGAAATTTAACATCAATCTTTATTTGTTCTTTTGTACCTAGCCAACAAAATATCCTATATCCTGTGTAC  
 TC-rich repeats  
 W1-box CGCG-box  
 -300 TAGATTTAATAAATATTGTGAGTAGCACTAATATGTTTTGAAATGTTGACCTCATTTCATACCGGGCCCGTGTGGCTAGTGTAAAGTAATACATTTGTT -201  
 ATCTAAATTTATTAACACTCACTCTGATTTATACAAATTTAACTTCACTGGGTAAAGTAGTGCGCCCGGCAACCGATCAAAATTTTATTATGTAACAA  
 TCT-motif box1 ERE WUN RAA-motif RAA-motif ACTTTA-motif WUN  
 -200 TAATAAAAATCAATTTGTTTACCGGTTGTATGAAAATATTTTACCCCGTAAAAAAAATCAATTTTTAGGATTTAGGTCTTAGTGAGTGTGCTACTGTCA -101  
 ATTATTTTAAAGTTAACAAATGGCCCAACTCTTTTATAAAAATGGGGCATTTTTTTTTAGTTAACAAATCCTAATCCAGAATCACTCACAGATGACAGT  
 E-box CAAT-box  
 -100 AAATATTTTACCCCATAAAAAATTTCAATGTTTAGGATTTAAGTCTTATTGAGTGTGCTACTGTCTTCTTATAAAAATCTAGTAACCTCCATCAAGCT -1  
 TTTATAAAAATGGGGTATTTTTTTAAGTTAACAAATCCTAAATTCAGAATACTCACAGATGCAGAAAAGATATTTTAGATCATTGAGAGGTAGTTCGA

1 AAGAGCACTCTAGTAAATTAACCCACATATATTCAAAGTTTGAATAATCCATG  
 TTCTCGTTGAGATCATTAAATTTGGTGTATATAAGTTTCAAACTTTAGGTAC  
 box 1
