# Supplementary material for: Studies on the Expression of Sesquiterpene Synthases Using Promoter-β-Glucuronidase Fusions in Transgenic Artemisia annua L
Source: PubMed Central journal article supplement (PMC3838408; doi:10.1371/journal.pone.0080643), 2013-11-22
Supplement: pone.0080643.s003.pdf [file pone.0080643.s003.pdf]

-874 ATCGGCGTGCGGTGCATGCCTGTATCGGTGCATTGTGGTCGATTTTCATAAAACGTATCAAATCTTGTCCATTCT -801  
TAGCCGCACGCCACGTACGGACATAGCCACGTAACACCAGCTAAAAGTATTTGCATAGTTTAGAACAGGTAAGA

-800 CGTACATAGGGTTACGTAATGGTTTCACATCTGATT **E-box** **Box I** **WUN** **E-box** **WUN**  
GCATGTATCCCAATGCATTACCAAGTGTAGACTAAAAAGTTTAAATGTTTGTAGTGTACAAAAATCCTGCATTTAAAGTTATGATTCTTTTTTAAGCCTTTTTT -701

-700 AAGTTTGTGCTCGCAAGTATATAGAAGTACCCCTCTAATGAAAGATGGTGTATTCTCGACATAATGTGAAATCA **Skn-1**  
TTCAAACAGCGAGCGTTCATATATCTTCATGGGGAGATTACTTTCTACCACAATAAGAGCTGTATTACACTTTAGTCAGTATGAATTGCTAGTTATTACT -601

-600 TTTATGAGATTTTTAACCTTTTAAAAATTGAATTTAAGTGAGTTATTTTCATTTGATTAAAAATAAGTGACTAGAATTTTCACATTTAATCTCTTATCGAT -501  
AAATACTCTAAAAATTGGAAAAATTTTAACTTAAATTCACTCAATAAAGTAAACTAATTTTTATTCACTGATCTTAAAAAGTAAATTAGAGAATAGCTA  
**GT1-motif**

-500 TTTAATCTTTGTTGAACCAAACCTTATATATAAAACCTTACTAAGTTTTGTTTTGAACTTATTTAAAACAAA **T/G box**  
AAATTAGAA **CAAAC** TTGGTTTGAATATATATTTTTGGAATGATTCAAACAAAACCTGAATAATTTTTGTT **TTGCAC** GCCGAGACGGCATTGTTTCCTTGTA **G-box** -401

-400 CTTTATCTGATAA **RAA motif** **GATA-box** **E-box** **CAAAT** GGGTATCTTTTGTGTTCTTGCTTACACAAATATTTATATTTGTGTATTTTATACTTTTATCAGTTAATACT -301  
**GAAATAGAC** TATTAATTTCCAAGG **GTTTAC** CCATAGAAAACACAAGAACGAATGTGTTTATAAATATAAACACATAAAAATATGAAAATAGTCAAT **TATGA**

as-2-box **GATA-box** **ABRE** **GATA-box** **RAA motif** **MBS** **E-box**  
-300 **TTAAAAGTACGTG** TAATCTTTTGGTAAATACTTTTATATAATTTTCATGAGTTGTAAAAATCTTTCTTTAATTTGATAGAA **CAAACA** AAATTGCCATATG -201  
AATTTTCA **TGCAC** ATTAGAAAACCATTTATGAAAATATATTAAGATCTCAACAATTTTTAAGAAAGAAATTAACATATCTTGTGTTTAAACGGTATAC  
**G-box** **AAGAA-motif** **AAGAA-motif** **E-box**

-200 TGCTAGCTTTTCTGTTCCCTGTATTATTTATCGAGTTGTATTAGAACTTGTTAGACTAAAACATGTA **AAGAAAGAA** TGAGGCCAGTTAATGGCTTTTCCAAAGT -101  
ACGATCGAAAAGACAAGGACATAATAAATAGCTCAACATAATCTTGAACAATCAGATTTTGTACATTTCTTTACCTCCG **GTCAAT** TACCGAAAAGGTTCA  
**G-box** **TGACG-motif ACE** **CAAT-box** **TATA-box** **MBS**

-100 GAAAGTATTTAT **TGACGTGGA** TATTTAAGGGGGTCGTTATAAAACACCA **AAAT** ATTCGAAACATTTTTTATGCT **TATAAA** TAGCATCATACCATCCTTAATTT -1  
**CTTTCATAAA** **TACTGCAC** CTATAAATCCCC **CAGCAA** TATTTTTGTGGTTTATAAGCTTTGTAAAAAATACGATATTTATCGTAGTATGGTAGGAATTAAA

**WUN** **CGTCA-motif** **TGA-element**  
1 **ATTCC**TAAGTAGCAATTGGCTTTGAATACATAGATCCAAACTTCTC**ATG** 49  
TAAGGATTCATCGTTAAACGAAACTTATGTATCTAGGTTTGAAGAG**TAC**  
**Eli-box3**
