# Supplementary material for: Studies on the Expression of Sesquiterpene Synthases Using Promoter-β-Glucuronidase Fusions in Transgenic Artemisia annua L
Source: PubMed Central journal article supplement (PMC3838408; doi:10.1371/journal.pone.0080643), 2013-11-22
Supplement: pone.0080643.s004.pdf [file pone.0080643.s004.pdf]

-1133 ATCCATAAAATTTATTGTAAAAAGAGCATAATA -1101  
TAGGTATTTAAATAACAATTTTTCTCGTATTAT

WUN CAT-box Skn-1 GATA-box  
-1100 AACTAAAATACATGATTCACCGAGAAATTTAATTTTCAGGGTACCCGCCACTGCAACGCGCGGATAACCTGCTAGTCATGATAAAAGGGGAATGTAACCT -1001  
TTGATTTTTATGTACTAAGTGGCTCTTTAAATTAAGTCCCATGGGCGGTGACGTTGCGCGCCTATTGGACGATCAGTAACTATTTTCCCCTTACATTGGA

WUN 3-AE3 binding site  
-1000 CGTACTATATAATAATGAAGTTTGGGCACATATCCAACTTTGGCCCCAATCTTGCGATGATTTTCATGCTTTGTCCTTGTGGTTCTTTTCCCTCCGTAAAATG -901  
GCATGATATATTATTACTTCAAACCCGTGATAGGTTGAAACCGGGGATTAGAACGCTACTAAAGTACGAAACAGGAACACCAAGAAAGGAGGCATTTTAC

E-box MNF1 AAGAA-motif box 4  
-900 CATATGAAATAGCAATCTCATATTGAATTGACTTTTGAATTTGTACACCTTCAGTACTCCATCGTTCTTCATAATATTATCTTCAGTCCTCAAAATTAAT -801  
GTATACTTTTATCGTTAGAGTATAACTTAACTGAAAACCTTAAACATGTGGAAGTCATGAGGTAGCAAGAAGTATTTATAATAGAAGTCAGGAGTTTTAATTA

HSE WUN WUN G-box box 4 WUN GATA-motif TC-rich repeats  
-800 AAATTTTCATATCTAATTGCCGCTTAACAGTCCCTGGACTTTGATACTTTGCGCCACGTTATTTAAATACGGCGTAACTAATTCATCAAGTTACGCCGTAAC -701  
TTTTAAAGTATAGATTAACGGCGAATTTGTCAGGGACCTGAAACTATGAAACGCGGTGCAATAATTAATGCCGATTTGATTAAGTAGTTCAATGCGGCATTG

WUN WUN ABRE box 4 WUN  
-700 TTTTCGTCGGTTTAACTTATCCACTCCATAAATTTCTCTACGGCGTAACCAAATTACCAAATTATGCCGTAGCCTTTATAATAAATTAATACGACGTAA -601  
AAAAGCAGGCAAATTTGAATAGGTGAGGTATTTAAAGAGATGCCGCATTGGTTAATGGTTAATACGGCATCGGAAATATTATTAATTAATGCTGCATT

MRE Skn-1  
-600 CCTAAAGAATAGTTTACGCCGTAATCTCTTCAATCTCATCAATCCATTCTGTGTCCTAACTACGCCTTAACCTCATGTCATGGTTACGGCGTAACCTTC -501  
GGATTTCTTATCAAATGCCGCATTAGAGAAGTTAGAGTAGTTAGGGTAAGACACAGGATTGATGCGGAATTTGGAGTACAGTACCAATGCCGCATTGGAAG

WUN GT1-motif G-box O2-site  
-500 GTAATACTTAAAAAATAGCCTTTATAATGTGTTACGGCGTAGTCCACGTACCAATTACGCCGTAACCTGTAGTCGGAATATTTTACGACTATTTTACC -401  
CATTATGAATTTTTTTTATCGGAAATATTACACAATGCCGCATCAGGTGCAATGGTTAATGCCGCATTGGACATCAGCCTTATAAAAAGTCGTGATAAAAATGG

E-box ACE G-box ABRE E-box box 4  
-400 TTTTCTCGCATCATTTCGGCTCCACGCCTCATTGTCTCGAAATGTACATATGAACAAATATGAACGAATTAAGTATAATATTAATATAAAATTAGGCCA -301  
AAAAGAGCGTAGTAAAGGCGAGGTTGCGGAGTAAACAGGACTTTACATGTATACCTGTTTATACCTGCTTAATTCATATTATAATTATTTAATCCGGT

RAA motif  
-300 TAAACATGGGAATTTGATATATAAAAATATCAGGCTAATTTGATGTTATCAGTCTCGGATGTAATAAGCACAAAGGCAACTAGGGCATTAGGGAATTATC -201  
ATTTGTACCCTTAACTATATAATTTATAGTCCGATTAACACTACAATAGTCAGAGCCTACATTTATCGTGTTCGGTTGATCCCGTAAATCCCTTAATAG

box 4 ATCT-motif  
-200 CCTTAACTTATTTAACAAGTCCAAGTTTTCATTTATATTCATATTAATTTGTTGTCTTAAGCATTACCGAGTTAGCATTGTTTAGCAATCTAATCTTTAA -101  
GGAATTGAATAAATTTTTCAGGTTCAAAGTAAATATAAGTATAATTAACAACAGAATTCGTAATGGCTCAATCGTAACAAATCGTTTAGATTAGAAATT

box 1 CAAT-box TGACG-motif AC-II TATA-box GATA-motif  
-100 TTTACGACTTTTCGTTTTTCAAACAACAATCAAAAACAAATACCTGACGTTCTTACCAACCTCCAGCTTATATATATACACCCTTTAGCTAGCTCTATACTT -1  
AAATGCTGAAAGCAAAGTTTTTGTTTAGTTTTGTTTTATGGACTGCAAGAAGTGGTGGAGGTCGAATATATATATGTGGAAATCGATCGAGATATGAA

1 ACCCAAAGTATCTTAATCAGCGTATACTAATTCGCATCTTTTATCAAGCATG  
TGGGTTTCATAGAATTAGTCGCATATGATTAAGCGTAGAAAATAGTTCGTAC
