# Supplementary material for: Studies on the Expression of Sesquiterpene Synthases Using Promoter-β-Glucuronidase Fusions in Transgenic Artemisia annua L
Source: PubMed Central journal article supplement (PMC3838408; doi:10.1371/journal.pone.0080643), 2013-11-22
Supplement: pone.0080643.s005.pdf [file pone.0080643.s005.pdf]

-1482 <sup>ARE</sup> ATCACTCAAGGATGGATGTATTTTCGT <sup>ARE</sup> **TCGTTT**TTTCATGGTTT <sup>ARE</sup> TTTTGTGTTGTTGTTTTCATGGTTT TTTTGTGTTGTGTT -1401  
 TAGTGAGTTCCCTACCTACATAAAGCAACCAAAAAGTACCAAAAAAACAACAAACAAAAGTACCAAAAAAACAACAA

-1400 <sup>GATA-box</sup> TGTGTGTTGTTGTTT <sup>GATA-box</sup> **AGATAGATTTTATTTTCAGATATTTT**TTTTCGATAGTTTTTTTTTTTTTTTTTTTTTTTTTTTTTTTTTTTTTTAGATTTAC <sup>Box I</sup> **TTTCAA** -1301  
 ACAAACAACAAAAAATCTATCTAAAATAAAGT **CTATAAAAAA**ACGATCAAAAAAAAAAAAAAAAAAAAAAAAAAAAAAAAAAAATCTAAATGAAAGTT

-1300 <sup>HSE</sup> **ATTTGAATTTTTTTAGTAGATTTTAT** <sup>Box I</sup> **TTTCAA**TCTTTTTTTATAGTTTTTTTTTTTTTTTTTTTTTTTTTTTTTTTTTTTTTTGAAGATTATACTTTCAATT -1201  
 TAA**CTTAAAAA**ATCCATCTAAAATAAAGTTAGAAAAAATATCAAAAAAAAAAAAAAAAAAAAAAAAAAAAAAAAAAAATCTCTAATGAAAGTTAA

-1200 <sup>HSE</sup> TTAGATTTT <sup>GATA-box</sup> **AGATAGATTTTAT** <sup>Box I</sup> **TTTCAA**TCTTTTTTTT <sup>GATA-box</sup> **TGATAGATTTT**TGTGTGTGTGTTTTTTTTTTAGATTTTACTTTTAAATTTGAATTT -1101  
 AACTAAAAAATCTATCTAAAATAAAGTTTAGAAAAAACAATCTAAAACACACACACAAAAAATACTAAAATGAAAATTTAA**ACTTAA**

-1100 <sup>GATA-box</sup> TTTT <sup>Box I</sup> **AGATAGATTTTAT** <sup>Box I</sup> **TTTCAA**TCTTTTTTTTTTTTTTTTTTTTTTTTACCAATCTGATTT <sup>GCN4 motif</sup> **TGTGTC**CAACCAACACGATTTCGAATTTTTTAAACCCCA -1001  
**AAAA**CTATCTAAAATAAAGTTAGAAAAAAAAAAAAAAAAAAAAAAATGGTTAGACTAAAACACAGTTGGTTTGTGCTAAAGCTTAA**AAATGG**GGGT <sup>GT1-motif</sup>

-1000 CCATTTAAACACCTCAATGTTAA**AAAT** <sup>WUN</sup> **TACCC**CGGTTTCTAAAT <sup>G-box</sup> **CCAGTT**TTTTAAATTTGTGAAACAACGCCCCCTTATATGTAGAATTTTGGAACT -901  
 GGTAAATTTGTGGAGTTACAATTTTAAATGGGCGCAAGATTTAG**GTGCA**AAAAATTTAAACACTTTGTTTTCGGGGGAATATACATCTTAAACCTTGA

-900 TATAATG <sup>Box 4</sup> **ATTAA**TTT <sup>RAA-motif</sup> **CAACA**TAA**AAAT**TACTTAA**GTATAAAT**TAGAATTTAGATCA <sup>ACE T/G-box</sup> **CAACA**GAACTAACAAAGGTATTTTATTAGCACCT <sup>WUN</sup> **TAATTG** -801  
 ATATTACTAATTTAAAGTTGATTTTAAATGATTCATATTTATATCTTTAAAT <sup>RAA-motif</sup> **CATAGT** <sup>WUN</sup> **GTGTCT**GATT **GT**TTTCCATAAAATAATCGTGAATTAAC

-800 <sup>WUN</sup> **CTT**CATATAT <sup>G-box</sup> **ATTATTCATGCACAGTTC** <sup>GATA-box</sup> **CAGTCA** <sup>Box-4</sup> **AGATAA**TATGATAT <sup>GATA-box</sup> **TTTAA**TATTTATAT <sup>GARE</sup> **TCC**GTGAAGAAATCAAGAGAGTAGTCTATTTTTTTTTTAT -701  
 GAATGTATAATAAAGTACGTGTGCAGGTCACTCTATTATACATATAAATTAATATAAGG**CACTCTTT**TAGTTCTCTCATCAGATAAAAAAATA

-700 TATTATATATTTTTTTTTTAA**CGCGG**TTTAA <sup>GAG-motif</sup> **GAGAGTAGTCTATTTAGT**GAT <sup>GATA-box</sup> **GGATAC**GC <sup>RAA-motif</sup> **CAACA**AGGCTAATTTTATTTGATTTTAATAGTTAC <sup>TCT-motif TC-rich repeats</sup> **AT** -601  
 ATAATAATAAATAAAAAAATTCCTCATCAGATAAATCACTACCTATGTACGTGTGTGTCGGATTAATAAACTAA**AAAT**TATCAATGTA

-600 <sup>Box 4</sup> **TAAT**CTCAGTAT <sup>Skn-1</sup> **GTCA**TATCTCTAGTACTTCTTCACTCCGTTTCCATCAGTTTAAAGAAAT <sup>Skn-1</sup> **GTCA**TATAATAGAACAGTCTTTATATATTTAAAAA -501  
 ATTAGAGTCATACAGTAA**TAGAG**ATCATGAAGAA**GTAGAGG**CAAAGGTAGTCAAATTCCTTACAGTATTATTTATCTTGTGAGAATATAAAATTTTTTTT

-500 CATATTTAACCAAAAATTAAGTAAACCTTATATATAATCACTATTTAGTAAAGTAA**GTGACA**ACTTTTACATTA**ACTACGACA**ACGC <sup>RY-element</sup> **CATGCATG**TTTCG -401  
 GTATA**AAATGG**TTTTTTAA**TTTCCAT**TTTGGAAATATATATTAGTGATAAAATCATTCGATTCAGTGTGAA**AAAT**GTAATTTGATGCTGTTGGGTACGTACAAGC

-400 TFGGTTATTTGTATACTGTTTATATATCAAGCAGGACGTGTAACATTTTCTCAGATTTATCTCCGATATCTTAA**ACTTTT**ACCGGTAACTAACATAAGTT -301  
**AACCAATA**AAACATATGACAATATATAAGTTCTGCT <sup>GATA-box</sup> **CTGCAC**ATTGTA**AAAGAGTCTAAATAGA**GGCTATGAATTTAGA**AAAT**GGCCATTTGATTTGATTTCAA

-300 TTCTTTAATGCATCTTGCTTGGATGATGGTAGAAA**ACTAGCGCAAT**CTCGGCTAGAGTAGTCT <sup>TCT-motif</sup> **TTAC**GTACATGCCTATAAAAA**CACTAA**TGACATTA -201  
 AAGAAATTCGTAGACGAACCTACTACCATCTTTTTGATCGCGTTTAGAGCCGATCTCATCAGAATGCATGTACGGATATTTTGTGAT **TACTG**TAATTT

-200 CA <sup>RAA-motif</sup> **CAACA**AAAAATAACTAACCTATTTATTTACGTAGTACG <sup>WUN</sup> **TAATTTCC**TAACTAGTCTTCTTATTTTGGAAATAAATTA**AAAT**TGTGACAGTTAGAAA -101  
 GTGTTGTTTTTATTTGATTTGGATAAATAAATGCATCATGCATTA**AAAGGAA**TGATCA <sup>GA-motif</sup> **GAGGAA**TAA**AAACCTATTT**TAATTTTAA**CACT** **GTCAATCTTT**

-100 ATGTTTGTACTGTTTTTGTCCTAGCTG <sup>CAAT-box</sup> **CAAT**TATGAGATGCATGAACATGTTCTCTTGCATTTGCCTATATA <sup>E-box</sup> **ATTGCTTCA**CTTTGATTTTCACTTTTTC -1  
**TA**CAACATGAACAAAACAGGATCGACAGTTAACTCTACGTGTACTTTGTACAGGAGAACGTAACGGATATATAAACGAAGTAA**AACT**AAAGTAAAG

1 AAATCAA**ACTCGCAAGATTTTGACATG** -1  
**TTATAGTT**TGAGCGTTCTAAA**ACTCTAC**  
<sup>GATA-box</sup>
